# Supplementary material for: A 16th century Escherichia coli draft genome associated with an opportunistic bile infection
Source: PubMed Central journal article supplement (PMC9203756; doi:10.1038/s42003-022-03527-1), 2022-06-16
Supplement: 42003_2022_3527_MOESM3_ESM.pdf [file 42003_2022_3527_MOESM3_ESM.pdf]

## **Description of Additional Supplementary Files**

**File name:** Supplementary Data 1

**Description:** List of E. coli strains used to create the pangenomes and phylogenies File name:

**File name:** Supplementary Data 2

**Description:** Plasmid gene coverage and comparison of the ancient strain to FSIS11816402
